# Supplementary material for: Changes in respiratory virus infection trends during the COVID-19 pandemic in South Korea: the effectiveness of public health measures
Source: PubMed Central journal article supplement — Korean J Intern Med. 2021 Aug 18;36(5):1157–68. doi: 10.3904/kjim.2021.026 (PMC8435496; doi:10.3904/kjim.2021.026), 2021-08-18
Supplement: kjim-2021-026-suppl1.pdf [file kjim-2021-026-suppl1.pdf]

**Supplementary Table 1. Individual preventive measures and the type of mask used, before and after the COVID-19 epidemic in an online survey in South Korea**

| Individual preventive measures                                 | Response frequency (n = 604)                   |                                              | p value <sup>b</sup> |
|----------------------------------------------------------------|------------------------------------------------|----------------------------------------------|----------------------|
|                                                                | Before COVID-19<br>2019.12–2020.1 <sup>a</sup> | After COVID-19<br>2020.2–2020.3 <sup>a</sup> |                      |
| Wearing a mask during regular outings or at work <sup>c</sup>  |                                                |                                              | < 0.001              |
| Never, 1 point                                                 | 327 (54.1)                                     | 4 (0.7)                                      |                      |
| Seldom, 2 point                                                | 203 (33.6)                                     | 24 (4.5)                                     |                      |
| Generally, 3 point                                             | 61 (10.1)                                      | 210 (34.8)                                   |                      |
| Always, 4 point                                                | 13 (2.2)                                       | 363 (60.1)                                   |                      |
| Mean of points                                                 | 1.60 ± 0.76                                    | 3.54 ± 0.61                                  |                      |
| Wearing a mask in public transportation (n = 598) <sup>d</sup> |                                                |                                              | < 0.001              |
| Never, 1 point                                                 | 374 (62.5)                                     | 5 (0.8)                                      |                      |
| Seldom, 2 point                                                | 161 (26.9)                                     | 6 (1.0)                                      |                      |
| Generally, 3 point                                             | 40 (6.7)                                       | 92 (15.4)                                    |                      |
| Always, 4 point                                                | 23 (3.8)                                       | 495 (82.8)                                   |                      |
| Mean of points                                                 | 1.52 ± 0.78                                    | 3.80 ± 0.48                                  |                      |
| Wearing a mask in public indoor space with other people        |                                                |                                              | < 0.001              |
| Never, 1 point                                                 | 375 (62.1)                                     | 5 (0.8)                                      |                      |
| Seldom, 2 point                                                | 168 (27.8)                                     | 10 (1.7)                                     |                      |
| Generally, 3 point                                             | 44 (7.3)                                       | 114 (18.9)                                   |                      |
| Always, 4 point                                                | 17 (2.8)                                       | 475 (78.6)                                   |                      |
| Mean of points                                                 | 1.51 ± 0.75                                    | 3.75 ± 0.52                                  |                      |
| Adhering to correct cough etiquette <sup>e</sup>               |                                                |                                              | < 0.001              |
| Never, 1 point                                                 | 65 (10.8)                                      | 4 (0.7)                                      |                      |
| Seldom, 2 point                                                | 199 (32.9)                                     | 21 (3.5)                                     |                      |
| Generally, 3 point                                             | 232 (38.4)                                     | 198 (32.8)                                   |                      |
| Always, 4 point                                                | 108 (17.9)                                     | 381 (63.1)                                   |                      |
| Mean of points                                                 | 2.63 ± 0.90                                    | 3.58 ± 0.59                                  |                      |
| Adhering to correct hand-washing <sup>e</sup>                  |                                                |                                              | < 0.001              |
| Never, 1 point                                                 | 35 (5.8)                                       | 4 (0.7)                                      |                      |
| Seldom, 2 point                                                | 212 (35.1)                                     | 20 (3.3)                                     |                      |
| Generally, 3 point                                             | 260 (43.0)                                     | 231 (38.2)                                   |                      |
| Always, 4 point                                                | 97 (16.1)                                      | 349 (57.8)                                   |                      |
| Mean of points                                                 | 2.69 ± 0.80                                    | 3.53 ± 0.60                                  |                      |
| Correct hand-washing number <sup>f</sup>                       |                                                |                                              | < 0.001              |
| 0 (not done), 1 point                                          | 36 (6.0)                                       | 3 (0.5)                                      |                      |
| 1–5 times, 2 point                                             | 387 (64.1)                                     | 146 (24.2)                                   |                      |
| 6–10 times, 3 point                                            | 140 (23.2)                                     | 276 (45.7)                                   |                      |
| More than 10 times, 4 point                                    | 41 (6.8)                                       | 179 (29.6)                                   |                      |
| Mean of points                                                 | 2.31 ± 0.68                                    | 3.04 ± 0.75                                  | < 0.001              |
| Most used mask                                                 |                                                |                                              | -                    |
| Surgical mask                                                  | 279 (46.2)                                     | 75 (12.4)                                    |                      |

Supplementary Table 1. Continued

| Individual preventive measures | Response frequency (n = 604)                   |                                              | p value <sup>b</sup> |
|--------------------------------|------------------------------------------------|----------------------------------------------|----------------------|
|                                | Before COVID-19<br>2019.12–2020.1 <sup>a</sup> | After COVID-19<br>2020.2–2020.3 <sup>a</sup> |                      |
| KF94 mask (FFP2) <sup>g</sup>  | 157 (26.0)                                     | 431 (71.4)                                   |                      |
| KF80 mask (FFP1) <sup>g</sup>  | 53 (8.8)                                       | 64 (10.6)                                    |                      |
| Cotton mask                    | 77 (12.7)                                      | 24 (4.0)                                     |                      |
| Others                         | 38 (6.3)                                       | 10 (1.7)                                     |                      |

Values are presented as number (%) or mean ± standard deviation.

COVID-19, coronavirus disease 2019.

<sup>a</sup>For the survey, the cut-off day of the COVID-19 epidemic was defined as January 31, 2020. On January 27, the national infectious disease alert level went from 'caution' to 'alert.' To reduce recall bias, data was divided into monthly units.

<sup>b</sup>Comparison of mask use and personal hygiene before and after the COVID-19 epidemic was analyzed by paired *t* test.

<sup>c</sup>Likert scale responses: "Never," "Seldom," "Generally," "Always." Depending on the level of performance, the question was scored from 1 for 'Never' to 4 for 'Always.'

<sup>d</sup>Data were missing for six patients. Except for this item, all respondents had to complete the mandatory answers when proceeding with the online surveys and submit the final responses. The answer data of the respondents who stopped in the middle of the questionnaire could not be collected.

<sup>e</sup>Cover mouths and nose with tissue or elbow when coughing or sneezing. Wash hands with running water and soap or sanitiser for at least 30 seconds with six steps as Korean Centers for Disease Control and Prevention recommend.

<sup>f</sup>Scoring of proper hand-washing: 1 point (not done); 2 points (1–5 times); 3 points (6–10 times); 4 points (more than 10 times).

<sup>g</sup>KF94 masks certified by the Korean Ministry of Food and Drug Safety (similar to FFP2) are suitable for healthcare workers as filtering facepiece masks. The performance, such as filtering efficiency, is almost identical between KF94 and N95 [22]. Korea government supply KF94 masks to the public (two masks per person per week).
