# Supplementary material for: Changes in respiratory virus infection trends during the COVID-19 pandemic in South Korea: the effectiveness of public health measures
Source: PubMed Central journal article supplement — Korean J Intern Med. 2021 Aug 18;36(5):1157–68. doi: 10.3904/kjim.2021.026 (PMC8435496; doi:10.3904/kjim.2021.026), 2021-08-18
Supplement: kjim-2021-026-suppl4.pdf [file kjim-2021-026-suppl4.pdf]

**Supplementary Table 4. Pearson's correlation coefficients for personal hygiene before the COVID-19 outbreak, South Korea**

| Variable                                                    | (1)                | (2)                | (3)                | (4)                | (5)                | (6) |
|-------------------------------------------------------------|--------------------|--------------------|--------------------|--------------------|--------------------|-----|
| (1) Wearing a mask during regular outings or at work        | 1                  |                    |                    |                    |                    |     |
| (2) Wearing a mask in public transportation                 | 0.802 <sup>a</sup> | 1                  |                    |                    |                    |     |
| (3) Wearing a mask in public indoor space with other people | 0.788 <sup>a</sup> | 0.910 <sup>a</sup> | 1                  |                    |                    |     |
| (4) Adhering to correct cough etiquette                     | 0.223 <sup>a</sup> | 0.260 <sup>a</sup> | 0.229 <sup>a</sup> | 1                  |                    |     |
| (5) Adhering to correct hand-washing                        | 0.222 <sup>a</sup> | 0.253 <sup>a</sup> | 0.238 <sup>a</sup> | 0.514 <sup>a</sup> | 1                  |     |
| (6) Hand-washing number                                     | 0.134 <sup>b</sup> | 0.135 <sup>b</sup> | 0.143 <sup>a</sup> | 0.332 <sup>a</sup> | 0.564 <sup>a</sup> | 1   |

COVID-19, coronavirus disease 2019.

<sup>a</sup> $p < 0.001$ .

<sup>b</sup> $p = 0.001$ .
